# Supplementary material
Source: Research Square preprint supplement (doi:10.21203/rs.3.rs-9988132/v1)
Supplement: Supplementary file 1 [file f362074732cdbfd9bc0c3248.docx]

Table 3-1 Distribution of tuberculosis patients with comorbid diabetes among different population groups in Bao'an District, Shenzhen from 2016 to 2024

| Year | Population type | | | |
| --- | --- | --- | --- | --- |
| Local population | | Migrant population | |
| Comorbid diabetes | No comorbid diabetes | Comorbid diabetes | No comorbid diabetes |
| 2016 | 3（5.00%） | 57（95.00%） | 10（0.94%） | 1049（99.06%） |
| 2017 | 8（8.08%） | 91（91.92%） | 31（2.61%） | 1156（97.39%） |
| 2018 | 6（6.38%） | 88（93.62%） | 33（3.25%） | 983（96.75%） |
| 2019 | 12（11.01%） | 97(88.99%） | 52（4.90%） | 1009（95.10%） |
| 2020 | 10（7.63%） | 121（92.37%） | 63（6.21%） | 951（93.79%） |
| 2021 | 9（6.98%） | 120（93.02%） | 81（7.84%） | 952（92.16%） |
| 2022 | 20（14.81%） | 115（85.19%） | 79（8.45%） | 856（91.55%） |
| 2023 | 15（9.87%） | 137（90.13%） | 90（9.39%） | 868（90.61%） |
| 2024 | 15（10.64%） | 126（89.36%） | 124（12.77%） | 847（87.23%） |
| Total | 1050（10.21） | | 9234（89.79） | |
| χ² for trend | 2.908 | | 195.066 | |
| P value | 0.088 | | ＜0.001 | |

Note: Values outside parentheses represent "number of patient cases," while values within parentheses indicate "composition percentage (%)."

Table 3-2 Distribution of tuberculosis patients with comorbidity of diabetes across different age groups in Bao'an District, Shenzhen, from 2016 to 2024

| Year | Age group (years) | | | | | |
| --- | --- | --- | --- | --- | --- | --- |
| ＜30 | | 30-59 | | ≥60 | |
| Comorbid diabetes | No comorbid diabetes | Comorbid diabetes | No comorbid diabetes | Comorbid diabetes | No comorbid diabetes |
| 2016 | 1（0.20%） | 491（99.80%） | 9（1.61%） | 550（98.39%） | 3(4.41%） | 65（95.59%） |
| 2017 | 1（0.18%） | 567（99.82%） | 27（4.33%） | 596（95.67%） | 11（11.58%） | 84（88.42%） |
| 2018 | 2（0.45%） | 445（99.55%） | 28（5.00%） | 532（95.00%） | 9（8.74%） | 94（91.26%） |
| 2019 | 1（0.22%） | 449(99.78%） | 51（8.10%） | 579（91.90%） | 12（13.33%） | 78（86.67%） |
| 2020 | 1（0.20%） | 501（99.80%） | 59（10.33%） | 512（89.67%） | 13（18.06%） | 59（81.94%） |
| 2021 | 4（0.93%） | 425（99.07%） | 68（10.59%） | 574（89.41%） | 18（19.78%） | 73（80.22%） |
| 2022 | 1（0.27%） | 369（99，73%） | 75（12.69%） | 516（87.31%） | 23（21.10%） | 86（78.90%） |
| 2023 | 1（0.30%） | 332（99.70%） | 80（12.18%） | 577（87.82%） | 24（20.00%） | 96（80.00%） |
| 2024 | 2（0.62%） | 319（99.38%） | 102（15.81%） | 543（84.19%） | 35（23.97%） | 111（76.03%） |
| Total | 3912（38.04) | | 5478(53.27) | | 894（8.69） | |
| χ² for trend | 1.278 | | 114.390 | | 21.155 | |
| P value | 0.258 | | ＜0.001 | | ＜0.001 | |

Note: Values outside parentheses represent "number of patient cases," while values within parentheses indicate "composition percentage (%).
